# Supplementary material
Source: PubMed Central journal article supplement (PMC1557779)

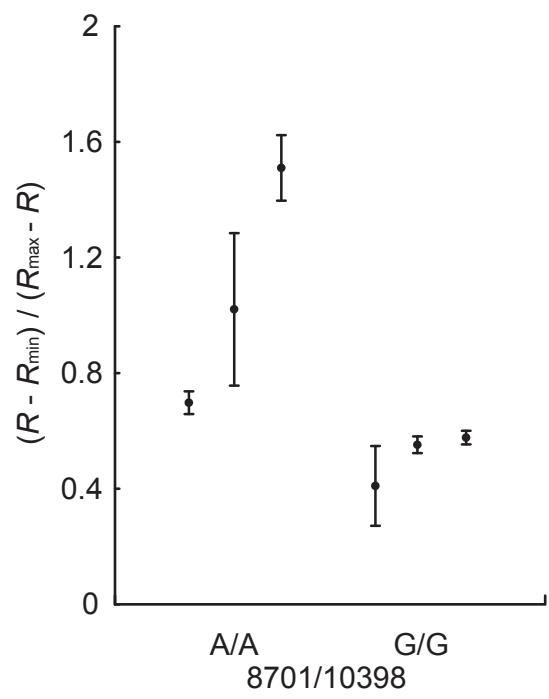

Supplement: pgen.0020128.sg001.pdf [file pgen.0020128.sg001.pdf]
